**Title: Dermal nerve growth factor is increased in prurigo nodularis compared to atopic dermatitis**

**Authors:** Junwen Deng BA<sup>1\*</sup>, Varsha Parthasarathy BS<sup>1\*</sup>, Zachary Bordeaux BS<sup>1</sup>, Melika Marani BS<sup>1</sup>, Kevin Lee BS<sup>1</sup>, Chi Trinh BS<sup>1</sup>, Nishadh Sutaria BS<sup>1</sup>, Hannah L. Cornman BS<sup>1</sup>, Anusha Kambala BS<sup>1</sup>, Thomas Pritchard MPH<sup>1</sup>, Shihua Chen BS<sup>1</sup>, Olusola O. Oladipo PhD<sup>1</sup>, Madan M. Kwatra PhD<sup>2</sup>, Martin P. Alphonse PhD<sup>1#</sup>, Shawn G. Kwatra MD<sup>1#</sup>

<sup>1</sup>Department of Dermatology, Johns Hopkins University School of Medicine, Baltimore, MD

<sup>2</sup>Department of Anesthesiology, Duke University School of Medicine, Durham, NC

\*Co-first authors with equal contributions

#Co-senior authors with equal contributions

**Corresponding Author:**

Shawn G. Kwatra, MD  
Associate Professor of Dermatology and Oncology  
Director, Johns Hopkins Itch Center  
Johns Hopkins University School of Medicine  
Office: Room 206, Lab: Suite 216, Koch CRBII  
1550 Orleans Street, Baltimore, MD 21231, USA  
Tel: 410-955-8662  
Email: [skwatra1@jhmi.edu](mailto:skwatra1@jhmi.edu)

**Keywords:** prurigo nodularis; atopic dermatitis; pruritus; transcriptome; immune; nerve growth factor; neuropathic; itch

**Funding sources:** SGK is supported by the National Institute of Arthritis and Musculoskeletal and Skin Diseases of the National Institutes of Health under Award Number K23AR077073-01A1. The content is solely the responsibility of the authors and does not necessarily represent the official views of the National Institutes of Health.

**Conflicts of interest:** Shawn G. Kwatra is an advisory board member/consultant for Abbvie, Celldex Therapeutics, Galderma, Incyte Corporation, Pfizer, Regeneron Pharmaceuticals, and Kiniksa Pharmaceuticals and has served as an investigator for Galderma, Kiniksa Pharmaceuticals, Pfizer Inc., and Sanofi.

**IRB Status:** Approved by the Johns Hopkins IRB (IRB00119007).

**Word count:** 1000

**Figures/Tables:** 2

**References:** 10

## Abstract

**Background:** Prurigo nodularis (PN) is a chronic, pruritic, inflammatory skin disease characterized by hyperkeratotic nodules on the trunk and extremities. While there is growing research on the immunological basis of PN, the neuropathic and structural components of PN lesions are unknown.

**Objective:** To determine the inflammatory, neuropathic, and structural pathways in PN compared to atopic dermatitis (AD).

**Methods:** Lesional and non-lesional skin biopsies were collected from 13 PN and 6 AD patients. mRNA and protein expression in biopsies was determined using RNA-Sequencing and immunohistochemistry (IHC), respectively. Differentially expressed genes (DEGs) were identified using the *DESeq2* R package and pathway level enrichment was determined using Gene Set Enrichment Analysis. IHC expression was quantified with QuPath followed by statistical comparison with the Student's t-test and Mann-Whitney *U*.

**Results:** Compared to lesional AD, lesional PN had greater mRNA expression of MMPs, OSM, NGF, IL1 $\beta$ , CXCL2, CXCL5, CXCL8, and insulin-like growth factors, and lower expression of CCL13, CCL26, EPHB1, and collagens. Compared to non-lesional AD, non-lesional PN showed upregulation of keratin-family genes. GSEA revealed that lesional PN had greater keratinization, cornified envelope, myelin sheath, TGF-beta signaling, extracellular matrix disassembly, metalloendopeptidase activity, and neurotrophin-TRK receptor signaling, while non-lesional PN had higher keratin filament, extracellular structure organization, extracellular matrix disassembly, and angiogenesis. IHC showed increased dermal nerve growth factor (NGF) expression in lesional PN compared to lesional AD ( $p=0.038$ ), and greater epidermal NGF compared to dermal NGF in non-lesional PN ( $p=0.014$ ).

**Limitations:** Single, tertiary care center.

**Conclusions:** PN demonstrated increased neurotrophic and extracellular matrix (ECM) remodeling signatures compared to AD, possibly explaining the morphological differences in their lesions. These signatures may therefore be important components of the PN pathogenesis and may serve as therapeutic targets.

Prurigo nodularis (PN) is a chronic, pruritic inflammatory skin disease characterized by hyperkeratotic nodules on the extensor surfaces and trunk.<sup>1</sup> PN features both inflammatory and neuropathic dysregulation and shares several pathogenic features with atopic dermatitis (AD), including cutaneous upregulation of interleukin (IL)-4R and Th22 transcriptomic signatures.<sup>1,2</sup> However, the exact pathogenesis of PN is not well described. In particular, the role of nerve growth factor (NGF), which regulates nerve development, has not been previously examined in PN in relation to AD. Therefore, we hypothesized that direct comparison of the cutaneous transcriptomes and immunohistochemical distribution of NGF in PN and AD patients would provide insight into the unique inflammatory and neuropathic mechanisms of PN.

This study was performed through transcriptomic and immunohistochemical analysis of skin punch biopsies from lesional and non-lesional areas of PN and AD patients with moderate-to-severe pruritus. Transcriptomic analysis was performed on a total of 38 lesional and non-lesional skin biopsies, including 13 PN (mean age 54.8±14.2 years, 84.6% female, and 76.9% African American) and 6 AD (mean age 55.2±15.8 years, 83.3% female, and 100.0% African American) patients. Full sequencing methodology can be found in our prior articles.<sup>1,2</sup> Normalization and differentially expressed gene (DEG) calculations were conducted using *DESeq2* (Bioconductor). DEGs were defined as genes with a log2-fold change <-1.5 or >1.5. The false discovery rate (FDR) was calculated to control for multiple hypothesis testing. Pathway-level comparisons were performed using Gene Set Enrichment Analysis (GSEA).

Immunohistochemistry (IHC) staining for NGF was performed on formalin-fixed, paraffin embedded sections on age-, sex-, and race-matched lesional PN and AD samples (n=8 each) and matched non-lesional samples (n=3 each). Epitope retrieval was performed using Ventana Ultra CC1 buffer (catalog# 6414575001, Roche). Anti-NGF (1:500 dilution; catalog#

ab52918, Abcam) primary antibody was applied and detected using an anti-rabbit HQ detection system (catalog# 7017936001 and 7017812001, Roche) followed by Chromomaps DAB IHC detection kit (catalog# 5266645001, Roche) and counterstaining with Mayer's hematoxylin. Quantitative analysis of the percentage of NGF-positive cells was performed using QuPath. Normality was analyzed using a Shapiro-Wilk test, and an unpaired T-test was performed for normally distributed data sets and a Mann-Whitney U test was performed for non-normal data sets.

Transcriptome analysis revealed 1,415 DEGs between lesional PN and AD skin (PN/AD L), 42 DEGs between non-lesional PN and AD skin (PN/AD NL), and 6 DEGs in common between PN/AD L and PN/AD NL (Fig. 1A-B). Comparing lesional PN and AD skin, the significantly upregulated DEGs in PN included MCEMP1, matrix metalloproteinases (MMPs), OSM, NGF, IL1 $\beta$ , CXCL2, CXCL5, CXCL8, and insulin-like growth factors (IGFB/IGFLs) (Fig. 1C). Significantly downregulated DEGs in PN lesions included CCL13, CCL26, EPHB1, and collagens (COL4/6). Comparing non-lesional skin, PN showed significant upregulation of keratin-family genes (KRT/KRTAP) (Fig. 1D).

GSEA of lesional PN and AD skin revealed that PN lesions had higher enrichment of pathways including keratinization (normalized enrichment score [NES] 2.55, FDR<10<sup>-5</sup>), cornified envelope (NES 2.41, FDR<10<sup>-5</sup>), myelin sheath (NES 2.17, FDR 5.12x10<sup>-4</sup>), TGF-beta signaling (NES 2.09, FDR 0.001), extracellular matrix disassembly (NES 1.97, FDR 0.004), metalloendopeptidase activity (NES 1.90, FDR 0.008), and neurotrophin-TRK receptor signaling (NES 1.68, FDR 0.033) (Fig. 1E). GSEA of non-lesional PN and AD skin revealed that PN had higher enrichment of pathways including keratin filament (NES 3.16, FDR<10<sup>-5</sup>), extracellular structure organization (NES 3.40, FDR<10<sup>-5</sup>), extracellular matrix disassembly

(NES 2.07, FDR 0.01), and angiogenesis (NES 1.99, FDR 0.023) compared to AD (Fig. 1F). These findings of hyperkeratosis in PN compared to AD lesions were corroborated clinically (Fig. 2A) as well as histologically (Fig 2C-F). On immunohistochemical quantification of NGF expression, PN lesional samples had higher dermal NGF than AD lesional samples (6.89% vs 2.51% positive cells,  $p=.038$ ) (Fig. 2G-H). Furthermore, in non-lesional PN samples, there was greater epidermal compared to dermal NGF expression (16.93% vs 0.87%,  $p=0.014$ ).

This study revealed significant enrichment of extracellular matrix remodeling and neurotrophic signatures in PN compared to AD. NGF in the skin is crucial for the survival and regeneration of damaged cutaneous sensory nerves, and transcriptomic and immunohistochemical analysis demonstrated greater NGF expression in PN lesional dermal skin compared to AD. Prior studies have found decreased intraepidermal nerve fiber density in PN skin and increased numbers of NGF-positive papillary dermal nerve fibers compared to controls.<sup>3</sup> While we found that NGF expression in the PN epidermis is comparable to that in AD epidermis, we additionally found that NGF upregulation is more pronounced in PN lesions than in dermal AD lesions. Transcriptomic analysis also revealed dysregulation in other neurotrophic modulators such as insulin-like growth factors (IGF/IGFL), IL-1 $\beta$ , and ephrin receptor B1 (EPHB1). These results suggest that PN patients experience greater degrees of cutaneous neural dysregulation compared to AD.

Furthermore, neural dysregulation in PN can be potentiated by alterations in the extracellular matrix. We found that PN lesions had decreases in collagen VI and increases in oncostatin M (OSM), and matrix metalloproteinases (MMPs) compared to AD lesions. Studies have shown that lack of collagen VI, which is necessary for maintaining nerve function and regeneration, can delay peripheral nerve regeneration.<sup>4</sup> OSM, a cytokine with roles in

proliferation or differentiation of hematopoietic and neuronal cells, can also modulate extracellular matrix components and maintain chronic inflammation.<sup>5,6</sup> These findings are concordant with human clinical trials to date that OSM inhibition has greater efficacy in PN than AD.<sup>7</sup> OSM can also upregulate MMP activity, which in turn enhances inflammation through degradation of extracellular structures, enabling immune cells to enter and exit skin, and proteolytic activation of cytokines and chemokines.<sup>8-10</sup> Immunomodulators activated by MMPs include IL-1 $\beta$ , CXCL5, and CXCL8,<sup>8</sup> whose genes were upregulated in lesional PN skin. Alterations in extracellular matrix components can therefore be major contributors to enhanced inflammation, fibrosis, and neural dysregulation in PN.

In conclusion, we present novel findings demonstrating dysregulation of neural regeneration and extracellular matrix remodeling signatures in PN compared to AD patients. Limitations of this study include patient recruitment from a single tertiary care center, restricting generalizability. Nonetheless, these findings provide deeper insight into the differences in pathogenesis between PN and AD and may aid in the identification of future therapeutic targets.

## References

1. Belzberg M, Alphonse MP, Brown I, et al. Prurigo Nodularis Is Characterized by Systemic and Cutaneous T Helper 22 Immune Polarization. *J Invest Dermatol.* Sep 2021;141(9):2208-2218.e14. doi:10.1016/j.jid.2021.02.749
2. Wongvibulsin S, Sutaria N, Kannan S, et al. Transcriptomic analysis of atopic dermatitis in African Americans is characterized by Th2/Th17-centered cutaneous immune activation. *Sci Rep.* May 27 2021;11(1):11175. doi:10.1038/s41598-021-90105-w
3. Schuhknecht B, Marziniak M, Wissel A, et al. Reduced intraepidermal nerve fibre density in lesional and nonlesional prurigo nodularis skin as a potential sign of subclinical cutaneous neuropathy. *Br J Dermatol.* Jul 2011;165(1):85-91. doi:10.1111/j.1365-2133.2011.10306.x
4. Chen P, Cescon M, Zuccolotto G, et al. Collagen VI regulates peripheral nerve regeneration by modulating macrophage recruitment and polarization. *Acta Neuropathol.* Jan 2015;129(1):97-113. doi:10.1007/s00401-014-1369-9
5. Gearing DP, Ziegler SF, Comeau MR, et al. Proliferative responses and binding properties of hematopoietic cells transfected with low-affinity receptors for leukemia inhibitory factor, oncostatin M, and ciliary neurotrophic factor. *Proc Natl Acad Sci U S A.* Feb 1 1994;91(3):1119-23. doi:10.1073/pnas.91.3.1119
6. Ryan RE, Martin B, Mellor L, et al. Oncostatin M binds to extracellular matrix in a bioactive conformation: implications for inflammation and metastasis. *Cytokine.* Mar 2015;72(1):71-85. doi:10.1016/j.cyto.2014.11.007
7. Kiniksa Pharmaceuticals L. Kiniksa Announces Phase 2 Clinical Trial of Vixarelimab (KPL-716) in Prurigo Nodularis Meets Primary Efficacy Endpoint. GlobeNewswire, Inc.

182 Accessed November 21, 2021. [https://www.globenewswire.com/en/news-](https://www.globenewswire.com/en/news-release/2020/04/22/2019927/0/en/Kiniksa-Announces-Phase-2-Clinical-Trial-of-Vixarelimab-KPL-716-in-Prurigo-Nodularis-Meets-Primary-Efficacy-Endpoint.html)  
183 [release/2020/04/22/2019927/0/en/Kiniksa-Announces-Phase-2-Clinical-Trial-of-Vixarelimab-](https://www.globenewswire.com/en/news-release/2020/04/22/2019927/0/en/Kiniksa-Announces-Phase-2-Clinical-Trial-of-Vixarelimab-KPL-716-in-Prurigo-Nodularis-Meets-Primary-Efficacy-Endpoint.html)  
184 [KPL-716-in-Prurigo-Nodularis-Meets-Primary-Efficacy-Endpoint.html](https://www.globenewswire.com/en/news-release/2020/04/22/2019927/0/en/Kiniksa-Announces-Phase-2-Clinical-Trial-of-Vixarelimab-KPL-716-in-Prurigo-Nodularis-Meets-Primary-Efficacy-Endpoint.html)  
185 8. Parks WC, Wilson CL, López-Boado YS. Matrix metalloproteinases as modulators of  
186 inflammation and innate immunity. *Nat Rev Immunol*. Aug 2004;4(8):617-29.  
187 doi:10.1038/nri1418  
188 9. O'Kane CM, Elkington PT, Friedland JS. Monocyte-dependent oncostatin M and TNF-  
189 alpha synergize to stimulate unopposed matrix metalloproteinase-1/3 secretion from human lung  
190 fibroblasts in tuberculosis. *Eur J Immunol*. May 2008;38(5):1321-30. doi:10.1002/eji.200737855  
191 10. Harper JI, Godwin H, Green A, et al. A study of matrix metalloproteinase expression and  
192 activity in atopic dermatitis using a novel skin wash sampling assay for functional biomarker  
193 analysis. *Br J Dermatol*. Feb 1 2010;162(2):397-403. doi:10.1111/j.1365-2133.2009.09467.x  
194  
195  
196



197 **Fig 1.** Transcriptomic comparisons of prurigo nodularis (PN) and atopic dermatitis (AD) skin.  
 198 (A) Heatmap of gene expression for differentially expressed genes (DEGs) between PN lesional  
 199 vs. AD lesional samples, where red is higher expression and blue is lower expression. (B) Venn  
 200 diagram of DEGs for PN lesional and AD lesional samples compared to PN non-lesional and AD  
 201 non-lesional samples. (C) PN lesional vs. AD lesional volcano plot. (D) PN non-lesional vs. AD  
 202 non-lesional volcano plot. (E) Gene set enrichment analysis (GSEA) for selected significant  
 203 immune pathways in PN lesional vs. AD lesional skin. (E) GSEA for selected significant  
 204 immune pathways in PN non-lesional vs. AD non-lesional skin. FC, fold change; FDR, false  
 205 discovery rate p-values; NES, normalized enrichment score.

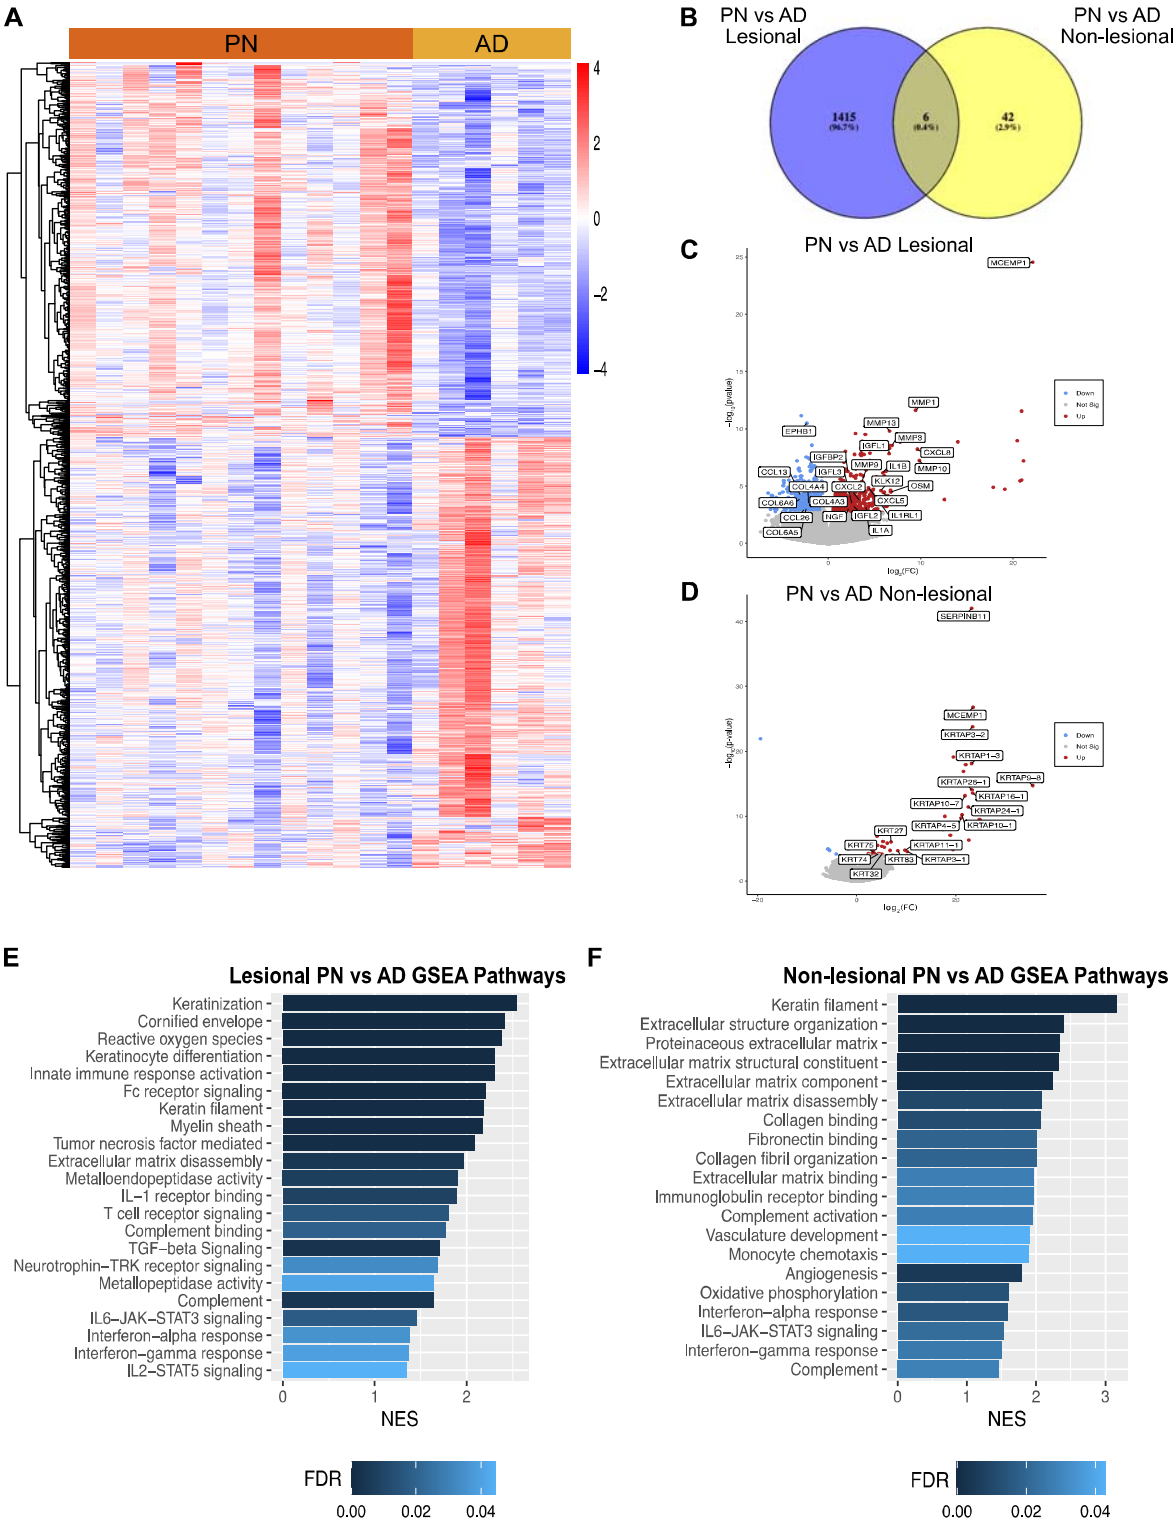

206

207

208 **Fig 2.** Immunohistochemistry (IHC) analysis of nerve growth factor (NGF) in prurigo nodularis  
 209 (PN) and atopic dermatitis (AD) skin. (A) Clinical image of a PN patient with fibrotic and  
 210 hyperkeratotic lesions on the abdomen. (B) Clinical image of an AD patient with lichenified  
 211 lesions on the abdomen. (C-F) Representative NGF IHC staining in PN lesional, PN non-  
 212 lesional, AD lesional, and AD non-lesional skin, respectively. Figures C, E: 10x. Figures D, F:  
 213 20x. (G) Quantification of the percentage of NGF-positive cells in lesional PN vs. lesional AD  
 214 skin (n=8 for each condition). (H) Quantification of the percentage of NGF-positive cells in non-  
 215 lesional PN vs. non-lesional AD skin (n=3 for each condition). \*p<0.05.

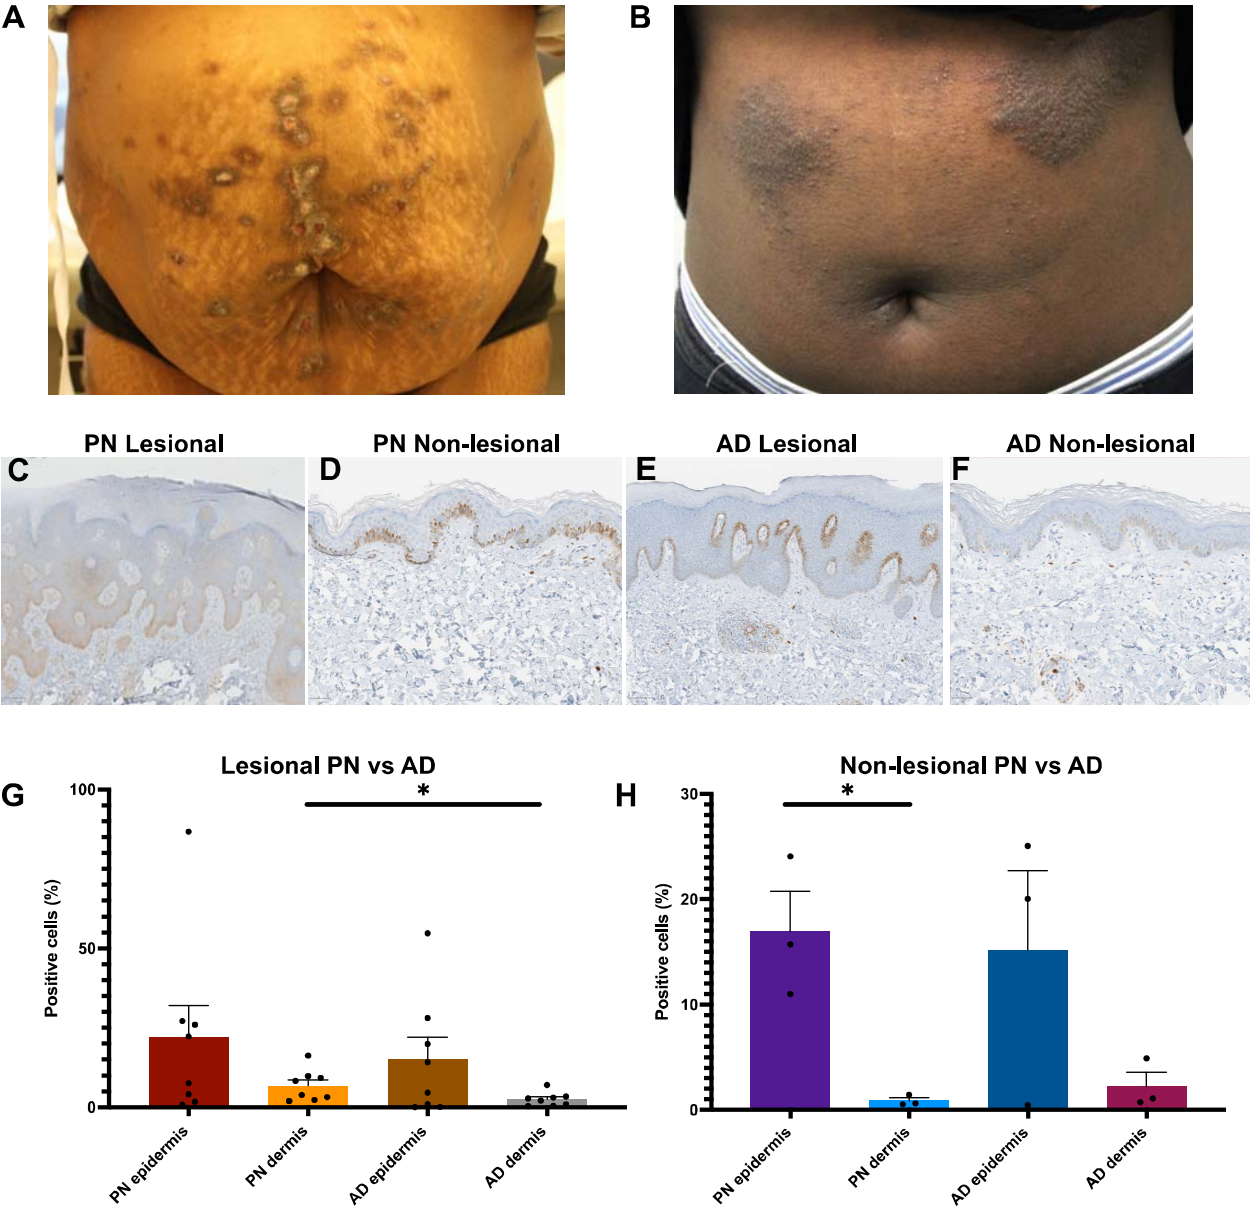

Source: https://www.biorxiv.org/content/10.1101/2022.06.15.496275v1.full.pdf
